# Supplementary material
Source: MDPI journal article supplement (https://www.mdpi.com/2673-8112/2/4/32)
Supplement: s1 [file s1]

Archive with 2 entries (2 files):
- covid-1611338-supplementary/Supplemental File S1.pdf
- covid-1611338-supplementary/Supplemental+tables.xlsx
