# Supplementary material
Source: MDPI journal article supplement (https://www.mdpi.com/2673-8112/2/4/32)
Supplement: s1 [file s1 › covid-1611338-supplementary/Supplemental+tables.xlsx]

## Sheet: Table S1
Table S1. Demographic characteristics of the participants
Characteristics		Quantity	Proportion
Gender	Male	170	0.3769
	Female	281	0.62306
Age (years)	< 18	9	0.02
	18 ~ 25	199	0.4412
	26 ~ 30	49	0.1086
	31 ~ 40	61	0.1353
	41 ~ 50	101	0.2239
	51 ~ 60	30	0.0665
	> 60	2	0.0044
Education level	Middle school	8	0.0177
	High school	38	0.0843
	Bachelor	280	0.6208
	Graduate	125	0.2772
Occupation	Students	210	0.4656
	Production staff	8	0.0177
	Salesperson	15	0.0333
	Marketing & public relation practitioner	3	0.0067
	Customer service	2	0.0044
	Office support	13	0.0288
	Human resource	3	0.0067
	Finance & audit Staff	7	0.0155
	Clerk	8	0.0177
	Research & development	26	0.0576
	Administration Staff	24	0.0532
	Teacher	71	0.1574
	Consultant	2	0.0044
	Professionals (accountant, lawyer, architect, journalist, doctor and nurse, etc.)	24	0.0532
	Others	32	0.071
	Retired	3	0.0067
Province	Guangdong	141	0.312639
	Jiangsu	44	0.097561
	Liaoning	38	0.0842572
	Jiangxi	35	0.0776053
	Hunan	22	0.0487805
	Henan	21	0.0465632
	Beijing	19	0.0421286
	Shanghai	13	0.0288248
	Hubei	13	0.0288248
	Hebei	12	0.0266075
	Shaanxi	10	0.0221729
	Heilongjiang	9	0.0199557
	Shandong	8	0.0177384
	Sichuan	8	0.0177384
	Yunnan	8	0.0177384
	Guangxi	7	0.0155211
	Anhui	6	0.0133038
	Chongqing	6	0.0133038
	Zhejiang	5	0.0110865
	Fujian	4	0.00886918
	Jilin	3	0.00665188
	Shanxi	3	0.00665188
	Gansu	3	0.00665188
	Guizhou	3	0.00665188
	Hong Kong	2	0.00443459
	Qinghai	1	0.00221729
	Ningxia	1	0.00221729
	Xinjiang	1	0.00221729
	Hainan	1	0.00221729
	Tianjin	1	0.00221729
	Overseas	3	0.00665188

## Sheet: Table S2
Table S2. Correlation coefficient analysis of sleep onset time and wake-up time in control and pandemic period
			Sleep onset time (control)	Sleep onset time (pandemic period)	Wake-up time (control)	Wake-up time (pandemic period)
Spearman's Rho	Sleep onset time (control)	Correlation coefficient	1	0.59367	0.468932	0.396184
		Sig. (2-tailed)		6.91443e-39	1.8503e-24	2.59849e-17
		N	422	394	422	422
	Sleep onset time (pandemic period)	Correlation coefficient	0.59367	1	0.313906	0.538351
		Sig. (2-tailed)	6.91443e-39		8.82643e-11	4.91288e-32
		N	394	408	408	408
	Wake-up time (control)	Correlation coefficient	0.468932	0.313906	1	0.519289
		Sig. (2-tailed)	1.8503e-24	8.82643e-11		1.65521e-32
		N	422	408	451	451
	Wake-up time (pandemic period)	Correlation coefficient	0.396184	0.538351	0.519289	1
		Sig. (2-tailed)	2.59849e-17	4.91288e-32	1.65521e-32
		N	422	408	451	451
**P < 0.01, *P < 0.05

## Sheet: Table S3
Table S3. Changes in the morning wake-up time of responders
Control	The period after emergency launch	Quantity	Proportion
Before 7:00	Before 7:00	42	0.0931264	0.355
	7:00~9:00	90	0.199557
	After 9:00	28	0.0620843
7:00~9:00	Before 7:00	6	0.0133038	0.517
	7:00~9:00	121	0.268293
	After 9:00	106	0.235033
After 9:00	Before 7:00	0	0	0.129
	7:00~9:00	2	0.00443459
	After 9:00	56	0.124169

## Sheet: Table S4
Table S4. Changes in the circadian variables at different ages
Type	Advanced phase		Delayed phase		Became irregular		Became regular		All phase changing types
Age	Quantity	Proportion	Quantity	Proportion	Quantity	Proportion	Quantity	Proportion	Quantity	Proportion
<18	1	0.111111	1	0.111111	2	0.222222	0	0	4	0.444444
18~25	17	0.0854271	30	0.150754	15	0.0753769	6	0.0301508	68	0.341709
26~30	5	0.102041	6	0.122449	2	0.0408163	1	0.0204082	14	0.285714
31~40	5	0.0819672	14	0.229508	4	0.0655738	3	0.0491803	26	0.42623
41~50	4	0.039604	27	0.267327	5	0.049505	4	0.039604	40	0.39604
51~60	1	0.0333333	3	0.1	0	0	0	0	4	0.133333
Total	33	0.0731707	81	0.179601	28	0.0620843	14	0.0310421	156	0.34
Quantity means the number of responders.

## Sheet: Table S5
Table S5. Correlation coefficients between changes of all variables.
			Self-reported circadian change	Changes in difficulty falling asleep	Changes in difficulty waking up	Changes in wake-up time	Changes in sleep onset time	Changes in daily dine times	Changes in night snack times	Changes in total sleep duration	Changes in sleep quality	Changes in nocturnal wake-up episodes	Daytime napping duration change	KSS sleepiness	Gender	Education	Age	Changes in exercise	Worry	Stupefaction	Downheartedness	Depression	Anxiety	Fear	Spring festival holiday	Concerns about epidemic situation	Quarantine and community containment
Spearman's Rho	Self-reported circadian change	Correlation coefficient	1	.337**	.426**	.356**	.367**	-.189**	0.014105	.180**	-.102*	.148**	0.00486532	.100*	.130**	-0.00936284	0.0317514	-.109*	0.00815267	0.052472	0.0747982	0.0766071	0.040941	0.00924076	.130**	.154**	.160**
		Sig. (2-tailed)		1.86398e-13	2.92308e-21	6.96752e-15	1.74492e-14	5.13246e-05	0.787411	0.000118356	0.030303	0.00210513	0.917933	0.0328911	0.00578208	0.842819	0.501205	0.0205589	0.86292	0.266135	0.112674	0.104213	0.38572	0.844842	0.00575501	0.00103922	0.000654138
		N	451	451	451	451	409	451	368	451	451	432	451	451	451	451	451	451	451	451	451	451	451	451	451	451	451
	Changes in difficulty falling asleep	Correlation coefficient	.337**	1	.252**	.131**	.173**	-0.0671372	0.0386545	0.0570778	-.275**	.160**	-0.0251834	.114*	.115*	-0.0445613	-0.0486327	-.109*	0.04937	0.0383694	0.0919902	0.0816593	0.043046	0.0775238	0.0578856	.102*	.168**
		Sig. (2-tailed)	1.86398e-13		6.16796e-08	0.00517007	0.000424769	0.154613	0.45974	0.226367	2.70505e-09	0.000859992	0.593746	0.0157455	0.0148923	0.345077	0.302754	0.0205379	0.295475	0.416287	0.0509033	0.0832272	0.361746	0.100122	0.219852	0.0300894	0.00033202
		N	451	451	451	451	409	451	368	451	451	432	451	451	451	451	451	451	451	451	451	451	451	451	451	451	451
	Changes in difficulty waking up	Correlation coefficient	.426**	.252**	1	.195**	.231**	-0.0287864	0.000820768	0.0708462	-0.0533885	0.0555126	-0.0610362	0.0645115	0.0533875	-0.0640499	0.0105334	-0.0502471	-0.0410164	0.0499859	0.0113086	0.049376	-0.00967235	-0.0171801	0.033759	.134**	0.0803677
		Sig. (2-tailed)	2.92308e-21	6.16796e-08		2.98281e-05	2.36569e-06	0.542021	0.987481	0.133031	0.257862	0.249587	0.195727	0.171425	0.257871	0.174517	0.823472	0.286968	0.384844	0.289484	0.810718	0.295415	0.837694	0.715959	0.474519	0.00442718	0.088237
		N	451	451	451	451	409	451	368	451	451	432	451	451	451	451	451	451	451	451	451	451	451	451	451	451	451
	Changes in wake-up time	Correlation coefficient	.356**	.131**	.195**	1	.308**	-.212**	-0.0421397	.393**	.094*	-0.0153788	-0.0111107	0.0488179	.163**	-0.0230298	0.0234253	-.164**	-0.0776775	-0.0461278	-0.046405	-0.0426553	-0.0919188	-.098*	.160**	0.00746561	.140**
		Sig. (2-tailed)	6.96752e-15	0.00517007	2.98281e-05		1.9597e-10	5.56205e-06	0.42025	3.87381e-18	0.0450151	0.749927	0.813969	0.300915	0.000526355	0.625702	0.619778	0.000463055	0.099449	0.328367	0.325466	0.366124	0.0510841	0.0366103	0.000651897	0.874372	0.00280368
		N	451	451	451	451	409	451	368	451	451	432	451	451	451	451	451	451	451	451	451	451	451	451	451	451	451
	Changes in sleep onset time	Correlation coefficient	.367**	.173**	.231**	.308**	1	-0.0302574	0.0331466	0.0292805	-.162**	0.00875287	.108*	-0.0235629	0.0573843	-0.0820595	0.0961628	-.125*	-0.0473583	-0.00293743	-0.00344682	0.0414641	-0.0140282	-0.0160014	0.04971	0.0752944	0.0630927
		Sig. (2-tailed)	1.74492e-14	0.000424769	2.36569e-06	1.9597e-10		0.54174	0.54365	0.554872	0.000982142	0.862501	0.0291018	0.634689	0.246893	0.0974656	0.0519768	0.0117251	0.339392	0.952774	0.944596	0.402956	0.777293	0.746969	0.315926	0.128452	0.2029
		N	409	409	409	409	409	409	338	409	409	394	409	409	409	409	409	409	409	409	409	409	409	409	409	409	409
	Changes in daily dine times	Correlation coefficient	-.189**	-0.0671372	-0.0287864	-.212**	-0.0302574	1	0.0294523	-.187**	-0.021422	0.00186642	.171**	-0.0608068	-.120*	0.0335088	0.0772647	0.0595111	-0.0275747	-0.054905	-0.0372299	-0.0353275	-0.0402501	0.0100982	-0.0549246	-0.0613232	-.110*
		Sig. (2-tailed)	5.13246e-05	0.154613	0.542021	5.56205e-06	0.54174		0.573303	6.6001e-05	0.650027	0.969145	0.000270793	0.197416	0.010501	0.477801	0.101266	0.207152	0.559164	0.244568	0.430275	0.454223	0.393795	0.830653	0.244399	0.19363	0.0191215
		N	451	451	451	451	409	451	368	451	451	432	451	451	451	451	451	451	451	451	451	451	451	451	451	451	451
	Changes in night snack times	Correlation coefficient	0.014105	0.0386545	0.000820768	-0.0421397	0.0331466	0.0294523	1	-0.0335423	0.0316325	0.0431905	0.0263884	0.077071	0.0196204	0.0495559	0.0252612	-0.0150514	-0.0501674	-0.0461239	-0.0408192	-0.0133185	0.00704387	-0.0324064	0.031881	0.0195517	-0.032415
		Sig. (2-tailed)	0.787411	0.45974	0.987481	0.42025	0.54365	0.573303		0.521235	0.545244	0.417205	0.613852	0.14004	0.707556	0.343131	0.62908	0.773523	0.337202	0.377632	0.434973	0.799005	0.892875	0.535448	0.542088	0.708533	0.53534
		N	368	368	368	368	338	368	368	368	368	355	368	368	368	368	368	368	368	368	368	368	368	368	368	368	368
	Changes in total sleep duration	Correlation coefficient	.180**	0.0570778	0.0708462	.393**	0.0292805	-.187**	-0.0335423	1	.229**	0.034949	.141**	0.0305922	0.0630052	0.0723961	-0.0673681	-.157**	-0.0338353	0.00325067	-0.0476502	-0.0506009	-0.0636856	-0.0474151	.292**	0.029248	.313**
		Sig. (2-tailed)	0.000118356	0.226367	0.133031	3.87381e-18	0.554872	6.6001e-05	0.521235		9.36399e-07	0.468748	0.00268082	0.516967	0.181667	0.124733	0.153196	0.000823324	0.47352	0.945115	0.312639	0.283584	0.176986	0.315035	2.65913e-10	0.535559	1.08512e-11
		N	451	451	451	451	409	451	368	451	451	432	451	451	451	451	451	451	451	451	451	451	451	451	451	451	451
	Changes in sleep quality	Correlation coefficient	-.102*	-.275**	-0.0533885	.094*	-.162**	-0.021422	0.0316325	.229**	1	-.174**	0.0821003	-0.0420557	-0.046346	0.0455257	-0.00397352	-0.0735047	-.116*	-.130**	-.180**	-.127**	-.134**	-.140**	.123**	-.146**	0.0132343
		Sig. (2-tailed)	0.030303	2.70505e-09	0.257862	0.0450151	0.000982142	0.650027	0.545244	9.36399e-07		0.000277192	0.0815704	0.372907	0.326083	0.334727	0.932936	0.119049	0.0138498	0.00553569	0.000124534	0.00705018	0.00438229	0.00295513	0.0086692	0.00189594	0.779258
		N	451	451	451	451	409	451	368	451	451	432	451	451	451	451	451	451	451	451	451	451	451	451	451	451	451
	Changes in nocturnal wake-up episodes	Correlation coefficient	.148**	.160**	0.0555126	-0.0153788	0.00875287	0.00186642	0.0431905	0.034949	-.174**	1	0.0273334	0.0428172	0.0161267	0.0636526	.122*	-0.0123614	0.0577536	0.0593553	0.0531567	0.0725873	0.0577734	0.0537583	0.00616027	.112*	0.0296633
		Sig. (2-tailed)	0.00210513	0.000859992	0.249587	0.749927	0.862501	0.969145	0.417205	0.468748	0.000277192		0.571003	0.374666	0.7382	0.186668	0.0109037	0.797802	0.230953	0.218252	0.270279	0.131986	0.230793	0.264887	0.898411	0.0198887	0.538627
		N	432	432	432	432	394	432	355	432	432	432	432	432	432	432	432	432	432	432	432	432	432	432	432	432	432
	Daytime napping duration change	Correlation coefficient	0.00486532	-0.0251834	-0.0610362	-0.0111107	.108*	.171**	0.0263884	.141**	0.0821003	0.0273334	1	0.0221171	-0.0306168	.154**	.236**	0.0155779	-0.0238398	-.093*	-0.05091	-0.00685526	-0.0335131	-0.0598491	0.073929	-0.0730008	0.0121555
		Sig. (2-tailed)	0.917933	0.593746	0.195727	0.813969	0.0291018	0.000270793	0.613852	0.00268082	0.0815704	0.571003		0.639463	0.51663	0.00101776	3.86841e-07	0.741455	0.613596	0.0472253	0.280649	0.884568	0.477745	0.20458	0.116927	0.121607	0.796842
		N	451	451	451	451	409	451	368	451	451	432	451	451	451	451	451	451	451	451	451	451	451	451	451	451	451
	KSS sleepiness	Correlation coefficient	.100*	.114*	0.0645115	0.0488179	-0.0235629	-0.0608068	0.077071	0.0305922	-0.0420557	0.0428172	0.0221171	1	.133**	0.0230769	-.115*	0.0214962	0.054519	.125**	.111*	0.0801274	0.0822346	0.0551265	.127**	.120*	0.0853559
		Sig. (2-tailed)	0.0328911	0.0157455	0.171425	0.300915	0.634689	0.197416	0.14004	0.516967	0.372907	0.374666	0.639463		0.00455758	0.624995	0.0146234	0.648896	0.247905	0.00773837	0.0182938	0.0891955	0.0810711	0.242667	0.00697199	0.010634	0.0701473
		N	451	451	451	451	409	451	368	451	451	432	451	451	451	451	451	451	451	451	451	451	451	451	451	451	451
	Gender	Correlation coefficient	.130**	.115*	0.0533875	.163**	0.0573843	-.120*	0.0196204	0.0630052	-0.046346	0.0161267	-0.0306168	.133**	1	-0.043482	-.158**	0.0207511	0.0304621	-0.0457909	-0.0493722	-0.0634487	-0.0238752	-0.00119416	.145**	0.066939	.119*
		Sig. (2-tailed)	0.00578208	0.0148923	0.257871	0.000526355	0.246893	0.010501	0.707556	0.181667	0.326083	0.7382	0.51663	0.00455758		0.356899	0.000764432	0.660291	0.518752	0.331916	0.295453	0.178606	0.613069	0.979824	0.00206779	0.155837	0.0114446
		N	451	451	451	451	409	451	368	451	451	432	451	451	451	451	451	451	451	451	451	451	451	451	451	451	451
	Education	Correlation coefficient	-0.00936284	-0.0445613	-0.0640499	-0.0230298	-0.0820595	0.0335088	0.0495559	0.0723961	0.0455257	0.0636526	.154**	0.0230769	-0.043482	1	.171**	.094*	0.0908488	0.0259763	0.0591744	0.0691413	0.079546	0.0368965	0.0743282	-0.00418057	0.0513055
		Sig. (2-tailed)	0.842819	0.345077	0.174517	0.625702	0.0974656	0.477801	0.343131	0.124733	0.334727	0.186668	0.00101776	0.624995	0.356899		0.00025752	0.0460141	0.0538591	0.582173	0.209739	0.142644	0.0915486	0.434418	0.114959	0.929451	0.276924
		N	451	451	451	451	409	451	368	451	451	432	451	451	451	451	451	451	451	451	451	451	451	451	451	451	451
	Age	Correlation coefficient	0.0317514	-0.0486327	0.0105334	0.0234253	0.0961628	0.0772647	0.0252612	-0.0673681	-0.00397352	.122*	.236**	-.115*	-.158**	.171**	1	-0.0317196	-.208**	-.137**	-.117*	-0.089888	-.143**	-.144**	-.283**	-0.0316714	-.217**
		Sig. (2-tailed)	0.501205	0.302754	0.823472	0.619778	0.0519768	0.101266	0.62908	0.153196	0.932936	0.0109037	3.86841e-07	0.0146234	0.000764432	0.00025752		0.501634	8.06349e-06	0.00361099	0.01321	0.0564565	0.002278	0.00218163	9.4261e-10	0.502285	3.23333e-06
		N	451	451	451	451	409	451	368	451	451	432	451	451	451	451	451	451	451	451	451	451	451	451	451	451	451
	Changes in exercise	Correlation coefficient	-.109*	-.109*	-0.0502471	-.164**	-.125*	0.0595111	-0.0150514	-.157**	-0.0735047	-0.0123614	0.0155779	0.0214962	0.0207511	.094*	-0.0317196	1	0.039268	0.029587	0.0735344	0.00215125	0.0451729	0.0301245	-0.0268037	-.093*	-0.0258853
		Sig. (2-tailed)	0.0205589	0.0205379	0.286968	0.000463055	0.0117251	0.207152	0.773523	0.000823324	0.119049	0.797802	0.741455	0.648896	0.660291	0.0460141	0.501634		0.405448	0.530839	0.118899	0.963662	0.33849	0.523397	0.570207	0.04788	0.583496
		N	451	451	451	451	409	451	368	451	451	432	451	451	451	451	451	451	451	451	451	451	451	451	451	451	451
	Worry	Correlation coefficient	0.00815267	0.04937	-0.0410164	-0.0776775	-0.0473583	-0.0275747	-0.0501674	-0.0338353	-.116*	0.0577536	-0.0238398	0.054519	0.0304621	0.0908488	-.208**	0.039268	1	.654**	.638**	.547**	.704**	.690**	.150**	.328**	.126**
		Sig. (2-tailed)	0.86292	0.295475	0.384844	0.099449	0.339392	0.559164	0.337202	0.47352	0.0138498	0.230953	0.613596	0.247905	0.518752	0.0538591	8.06349e-06	0.405448		1.80787e-56	7.1427e-53	1.31697e-36	1.31187e-68	4.63943e-65	0.00141808	8.90132e-13	0.00737723
		N	451	451	451	451	409	451	368	451	451	432	451	451	451	451	451	451	451	451	451	451	451	451	451	451	451
	Stupefaction	Correlation coefficient	0.052472	0.0383694	0.0499859	-0.0461278	-0.00293743	-0.054905	-0.0461239	0.00325067	-.130**	0.0593553	-.093*	.125**	-0.0457909	0.0259763	-.137**	0.029587	.654**	1	.765**	.708**	.694**	.626**	0.0633791	.389**	.161**
		Sig. (2-tailed)	0.266135	0.416287	0.289484	0.328367	0.952774	0.244568	0.377632	0.945115	0.00553569	0.218252	0.0472253	0.00773837	0.331916	0.582173	0.00361099	0.530839	1.80787e-56		6.53008e-88	7.3341e-70	4.01752e-66	1.6145e-50	0.179084	1.0069e-17	0.00061518
		N	451	451	451	451	409	451	368	451	451	432	451	451	451	451	451	451	451	451	451	451	451	451	451	451	451
	Downheartedness	Correlation coefficient	0.0747982	0.0919902	0.0113086	-0.046405	-0.00344682	-0.0372299	-0.0408192	-0.0476502	-.180**	0.0531567	-0.05091	.111*	-0.0493722	0.0591744	-.117*	0.0735344	.638**	.765**	1	.815**	.747**	.674**	0.0248593	.420**	.142**
		Sig. (2-tailed)	0.112674	0.0509033	0.810718	0.325466	0.944596	0.430275	0.434973	0.312639	0.000124534	0.270279	0.280649	0.0182938	0.295453	0.209739	0.01321	0.118899	7.1427e-53	6.53008e-88		3.14526e-108	1.13779e-81	4.57327e-61	0.598507	1.18817e-20	0.0025204
		N	451	451	451	451	409	451	368	451	451	432	451	451	451	451	451	451	451	451	451	451	451	451	451	451	451
	Depression	Correlation coefficient	0.0766071	0.0816593	0.049376	-0.0426553	0.0414641	-0.0353275	-0.0133185	-0.0506009	-.127**	0.0725873	-0.00685526	0.0801274	-0.0634487	0.0691413	-0.089888	0.00215125	.547**	.708**	.815**	1	.757**	.647**	0.00180545	.359**	0.0913502
		Sig. (2-tailed)	0.104213	0.0832272	0.295415	0.366124	0.402956	0.454223	0.799005	0.283584	0.00705018	0.131986	0.884568	0.0891955	0.178606	0.142644	0.0564565	0.963662	1.31697e-36	7.3341e-70	3.14526e-108		6.94088e-85	6.83192e-55	0.9695	3.42061e-15	0.0525435
		N	451	451	451	451	409	451	368	451	451	432	451	451	451	451	451	451	451	451	451	451	451	451	451	451	451
	Anxiety	Correlation coefficient	0.040941	0.043046	-0.00967235	-0.0919188	-0.0140282	-0.0402501	0.00704387	-0.0636856	-.134**	0.0577734	-0.0335131	0.0822346	-0.0238752	0.079546	-.143**	0.0451729	.704**	.694**	.747**	.757**	1	.729**	0.0679532	.409**	.111*
		Sig. (2-tailed)	0.38572	0.361746	0.837694	0.0510841	0.777293	0.393795	0.892875	0.176986	0.00438229	0.230793	0.477745	0.0810711	0.613069	0.0915486	0.002278	0.33849	1.31187e-68	4.01752e-66	1.13779e-81	6.94088e-85		7.46985e-76	0.149651	1.34399e-19	0.0182496
		N	451	451	451	451	409	451	368	451	451	432	451	451	451	451	451	451	451	451	451	451	451	451	451	451	451
	Fear	Correlation coefficient	0.00924076	0.0775238	-0.0171801	-.098*	-0.0160014	0.0100982	-0.0324064	-0.0474151	-.140**	0.0537583	-0.0598491	0.0551265	-0.00119416	0.0368965	-.144**	0.0301245	.690**	.626**	.674**	.647**	.729**	1	0.082051	.405**	.112*
		Sig. (2-tailed)	0.844842	0.100122	0.715959	0.0366103	0.746969	0.830653	0.535448	0.315035	0.00295513	0.264887	0.20458	0.242667	0.979824	0.434418	0.00218163	0.523397	4.63943e-65	1.6145e-50	4.57327e-61	6.83192e-55	7.46985e-76		0.0817541	3.30859e-19	0.017367
		N	451	451	451	451	409	451	368	451	451	432	451	451	451	451	451	451	451	451	451	451	451	451	451	451	451
	Spring festival holiday	Correlation coefficient	.130**	0.0578856	0.033759	.160**	0.04971	-0.0549246	0.031881	.292**	.123**	0.00616027	0.073929	.127**	.145**	0.0743282	-.283**	-0.0268037	.150**	0.0633791	0.0248593	0.00180545	0.0679532	0.082051	1	.148**	.514**
		Sig. (2-tailed)	0.00575501	0.219852	0.474519	0.000651897	0.315926	0.244399	0.542088	2.65913e-10	0.0086692	0.898411	0.116927	0.00697199	0.00206779	0.114959	9.4261e-10	0.570207	0.00141808	0.179084	0.598507	0.9695	0.149651	0.0817541		0.00157155	9.40129e-32
		N	451	451	451	451	409	451	368	451	451	432	451	451	451	451	451	451	451	451	451	451	451	451	451	451	451
	Concerns about epidemic situation	Correlation coefficient	.154**	.102*	.134**	0.00746561	0.0752944	-0.0613232	0.0195517	0.029248	-.146**	.112*	-0.0730008	.120*	0.066939	-0.00418057	-0.0316714	-.093*	.328**	.389**	.420**	.359**	.409**	.405**	.148**	1	.322**
		Sig. (2-tailed)	0.00103922	0.0300894	0.00442718	0.874372	0.128452	0.19363	0.708533	0.535559	0.00189594	0.0198887	0.121607	0.010634	0.155837	0.929451	0.502285	0.04788	8.90132e-13	1.0069e-17	1.18817e-20	3.42061e-15	1.34399e-19	3.30859e-19	0.00157155		2.64395e-12
		N	451	451	451	451	409	451	368	451	451	432	451	451	451	451	451	451	451	451	451	451	451	451	451	451	451
	Quarantine and community containment	Correlation coefficient	.160**	.168**	0.0803677	.140**	0.0630927	-.110*	-0.032415	.313**	0.0132343	0.0296633	0.0121555	0.0853559	.119*	0.0513055	-.217**	-0.0258853	.126**	.161**	.142**	0.0913502	.111*	.112*	.514**	.322**	1
		Sig. (2-tailed)	0.000654138	0.00033202	0.088237	0.00280368	0.2029	0.0191215	0.53534	1.08512e-11	0.779258	0.538627	0.796842	0.0701473	0.0114446	0.276924	3.23333e-06	0.583496	0.00737723	0.00061518	0.0025204	0.0525435	0.0182496	0.017367	9.40129e-32	2.64395e-12
		N	451	451	451	451	409	451	368	451	451	432	451	451	451	451	451	451	451	451	451	451	451	451	451	451	451
**P < 0.01, *P < 0.05

## Sheet: Table S6
Table S6. Difference in circadian rhythm and sleep between control and pandemic periods for both genders
			Daily dine times	Night snak times	Self-reported circadian regularity	Difficulty falling asleep	Difficulty waking up	Sleep onset time	Morning wake-up time	Daytime napping duration	Nocturnal wake-up episodes
Male	Control	Mean	2.89412	0.0973451	2.41176	2.23529	2.71176	2.3	1.79412	2.31176	0.528302
		N	170	113	170	170	170	160	170	170	159
		SD	0.449155	0.442489	1.1072	1.03942	1.18391	0.622432	0.695693	2.18991	0.794055
	Pandemic period	Mean	2.8	0.1	2.53529	2.23529	2.73529	2.3949	2.2	2.45294	0.627329
		N	170	140	170	170	170	157	170	170	161
		SD	0.50559	0.420688	1.22665	1.03372	1.22858	0.648054	0.675873	2.85769	0.913919
	Wilcoxon signed-rank test between periods	Z	-2.522	-0.136	-1.267	-0.121	-0.394	-2.111	-7.05	-0.896	-2.554
		Asymp. Sig. (2-tailed)	0.0116646	0.891756	0.205279	0.903905	0.693558	0.0348085	1.79502e-12	0.370322	0.0106506
Female	Control	Mean	2.88612	0.108247	2.43772	2.22064	2.67972	2.28244	1.76157	2.24911	0.268199
		N	281	194	281	281	281	262	281	281	261
		SD	0.388936	0.470513	1.07098	1.06288	1.16982	0.603626	0.635343	2.06204	0.585813
	Pandemic period	Mean	2.66548	0.151786	2.84698	2.41637	2.82206	2.42629	2.38434	2.38434	0.417293
		N	281	224	281	281	281	251	281	281	266
		SD	0.522887	0.547474	1.29618	1.18666	1.19986	0.584419	0.633841	2.97639	0.749038
	Wilcoxon signed-rank test between periods	Z	-6.309	-0.108	-5.571	-3.746	-2.305	-3.935	-11.649	-0.546	-3.642
		Asymp. Sig. (2-tailed)	2.80365e-10	0.914128	2.53905e-08	0.000179795	0.0211412	8.31857e-05	2.33114e-31	0.585153	0.00027038

## Sheet: Table S7
Table S7. Gender difference in difficulty falling asleep and wake-up time
		Male				Female
		Control		Pandemic period		Control		Pandemic period
		Quantity	Proportion	Quantity	Proportion	Quantity	Proportion	Quantity	Proportion
Difficulty falling asleep
Descriptive statstics	1	47	0.276471	45	0.264706	82	0.291815	76	0.270463
	2	60	0.352941	65	0.382353	98	0.348754	85	0.302491
	3	44	0.258824	40	0.235294	67	0.238434	61	0.217082
	4	14	0.0823529	15	0.0882353	25	0.088968	45	0.160142
	5	5	0.0294118	5	0.0294118	9	0.0320285	14	0.0498221
	Mean	2.23529		2.23529		2.22064		2.41637
	N	170		170		281		281
	SD	1.03942		1.03372		1.06288		1.18666
Wilcoxon signed-rank test	Z	-0.121				-3.746
	Asymp. Sig. (2-tailed)	0.903905				0.000179795
Wake-up time
Descriptive statstics	< 7:00	62	0.364706	25	0.147059	98	0.348754	23	0.0818505
	7:00-9:00	81	0.476471	86	0.505882	152	0.540925	127	0.451957
	> 9:00	27	0.158824	59	0.347059	31	0.11032	131	0.466192
	Mean	1.79412		2.2		1.76157		2.38434
	N	170		170		281		281
	SD	0.695693		0.675873		0.635343		0.633841
Wilcoxon signed-rank test	Z	-7.05				-11.649
	Asymp. Sig. (2-tailed)	1.79502e-12				2.33114e-31
"1-5" in the descriptive statistics means assigned values for increased degrees of difficulty falling asleep, in which 1 indicates "very easy" and 5 indicates "very difficult". Asymp. Sig. < 0.05 indicates significant difference between male and female responders.

## Sheet: Table S8
Table S8. Descriptive statistics of changes in circadian rhythms and sleep of both genders
		Changes in total sleep duration	Changes in sleep quality	Changes in nocturnal wake-up episodes	Daytime napping duration change	Changes in wake-up time	Changes in sleep onset time	Self-reported circadian change	Changes in difficulty falling asleep	Changes in difficulty waking up	KSS sleepiness	Changes in daily dine times	Changes in night snak times
Values assigned		Increase: < 1h = 1; 1-2 h = 2; > 2 h = 3; Remain = 0; Decrease: < 1h = -1; 1-2 h = -2; > 2 h = -3;	Increase = 1; remian = 0; decrease = -1	Once = 1; twice = 2; > twice = 3	0 min = 0; 0-30 min = 1; 30 min-1 h = 3; 1-2 h = 6; > 2 h = 10	< 7:00 = 1; 7:00 -9:00 = 2; > 9:00 = 3	< 22:00 = 1; 22:00-24:00 = 2: > 24:00 = 3"	A scale of 1-5,with 1 indicates the most regular and 5 indicates the most irregular.	A scale of 1-5,with 1 indicates the easiest and 5 indicates the most difficult.	A scale of 1-5,with 1 indicates the easiest and 5 indicates the most difficult.	Scores from the Karolinska Sleepiness Scale	Once = 1; Twice = 2; Three times = 3; > three times = 4	Once = 1; twice = 2; > twice = 3
Men	Mean	1.25294	0.111765	0.111111	0.141176	0.405882	0.0869565	-0.288235	-2.03269e-17	0.0235294	4.21176	-0.0941	-0.0071
	N	170	170	162	170	170	161	170	170	170	170	170	141
	SD	1.24064	0.609959	0.546019	2.54034	0.629615	0.517099	0.809984	0.721602	1.08215	1.74799	0.47726	0.36833
Women	Mean	1.38078	0.0604982	0.111111	0.135231	0.622776	0.141129	-0.245552	0.19573	0.142349	4.65836	-0.2206	-0.0044
	N	281	281	270	281	281	248	281	281	281	281	281	227
	SD	1.37355	0.54763	0.482661	3.01831	0.632496	0.547576	0.941232	0.86651	1.01472	1.76999	0.54222	0.27423
Total	Mean	1.33259	0.0798226	0.111111	0.137472	0.54102	0.119804	-0.261641	0.121951	0.097561	4.49002	-0.1729	-0.0054
	N	451	451	432	451	451	409	451	451	451	451	451	368
	SD	1.32507	0.571793	0.506722	2.84467	0.639429	0.535801	0.893341	0.819611	1.04105	1.77307	0.52177	0.31315
a. Values are assigned to variables of circadian rhythms and sleep, and changes are estimated by subtracting the value of control from the corresponding value of pandemic period. Mean, SD and N of the variables of men, women and all responders (Total) are shown in this table.
b. The number of male and female responders were 170 and 281, respectively. In some questions, responders who chose "irregular" was excluded, the corresponding N was less than 170 or 281.

## Sheet: Table S9
Table S9. Comparison of changes in circadian rhythms and sleep between genders
	Changes in total sleep duration	Changes in sleep quality	Changes in nocturnal wake-up episodes	Daytime napping duration change	Changes in wake-up time	Changes in sleep onset time	Self-reported circadian change	Changes in difficulty falling asleep	Changes in difficulty waking up	KSS sleepiness	Changes in daily dine times	Changes in night snak times
Mann-Whitney U	22181	22788	21615.5	23061.5	19738	18900.5	23017.5	21183.5	22560	20182	21279.5	15893.5
Wilcoxon W	36716	62409	34818.5	62682.5	34273	31941.5	37552.5	35718.5	37095	34717	60900.5	25904.5
Z	-1.33654	-0.983147	-0.334799	-0.64948	-3.44962	-1.15911	-0.717643	-2.43102	-1.13252	-2.82878	-2.554	-0.376
Asymp. Sig. (2-tailed)	0.181372	0.325535	0.737777	0.516028	0.000561372	0.246413	0.472978	0.0150565	0.257416	0.00467251	0.011	0.707
a. Differences are compared by using Mann-Whitney U test
b. Mann-Whitney U, Wilcoxon W and Z are test statistics. Asymp. Sig. < 0.05 indicates significant difference between male and female responders.

## Sheet: Table S10
Table S10. Numbers and proportions of responders who scored the corresponding degrees.
Degrees	Worry		Stupefaction		Downheartedness		Depression		Anxiety		Fear
	Quantity	Proportion	Quantity	Proportion	Quantity	Proportion	Quantity	Proportion	Quantity	Proportion	Quantity	Proportion
1	194	0.430155	229	0.507761	237	0.525499	285	0.631929	220	0.487805	243	0.538803
2	76	0.168514	83	0.184035	90	0.199557	86	0.190687	88	0.195122	88	0.195122
3	107	0.237251	93	0.206208	76	0.168514	48	0.10643	82	0.181818	68	0.150776
4	55	0.121951	24	0.0532151	29	0.0643016	15	0.0332594	44	0.097561	32	0.0709534
5	19	0.0421286	22	0.0487805	19	0.0421286	17	0.037694	17	0.037694	20	0.0443459
1-5 scale indicates the different degrees of negative emotions as follows:
1, 2, 3, 4, and 5 indicated no, slight, mild, moderate, and severe negative emotions, respectively

[truncated: 4 more sheets: Table S11, Table S12, Table S13, Table S14]
